# Supplementary material for: A 20-gene signature in predicting the chemoresistance of breast cancer to taxane-based chemotherapy
Source: Royal Society of Chemistry journal article supplement (doi:10.1039/c4mb00464g), 2014-08-19
Supplement: c4mb00464g1.xlsx [file c4mb00464g1.xlsx]

## Sheet: table1
Supplemental 1.Preliminary selection of 20-gene signature
These genes were significantly changed in both GSE349&350 and GSE25055 between chemoresistant and sensitive and resistant patients.
Up/down in resistant patients			1st round			p value		2nd round	20-gene
UP	DOWN		of selection		Gene	349&350	25055	of selection	signature
ADAM10	ACHE	NBR2		1	ADAM10	0.04	0.02		DBI
ARFGEF2	AES	NDUFA6		2	ARFGEF2	0.04	0.019	Preliminary test	ATG9A
ATP2A1	ARID5A	NSFL1C		3	ATP2A1	0.001	0.045	Bayesian	TNFRSF10C
BCAM	ATF3	ODC1		4	BCAM	0.004	0.01	discriminative	FGFR1
CAMK2B	ATG9A	PDE6D		5	CXCR1	0.003	0.01	method	PRKCI
CLC	BTN3A3	PDXK		6	DCTN1	0.020108	0.038		ATF3
CXCR1	CAT	PEMT		7	DTNA	0.0128791	0.022	Kick out if decrease	TNPO2
DCTN1	CCDC94	PEPD		8	EFNA2	0	0.048	discriminative power	UBE3B
DTNA	CCND2	PHB2		9	EMR2	0.045	0.01		TOR1A
EFNA2	CDH4	PPP1R7		10	FAAH	0.01	0.044		SATB2
EML2	CDKN1C	PRKCI		11	FGFR1	0.000923825	0.004		GOLGA2
EMR2	CDKN2C	PRKD3		12	GRM1	0.001	0.03		GNAI3
EPHA5	COL14A1	PRPF4		13	HSF4	0.01	0.035		DTNA
FAAH	CSNK2B	RNASE1		14	KCNMA1	0	0.04		TUBGCP3
FGFR1	CTSC	RNF114		15	L3MBTL1	0.047	0		PDXK
FPR2	DBI	RPL10A		16	LARP1	0.03	0.04		BTN3A3
GRM1	EEF1D	RPL12		17	LGALS4	0.04	0.009		CDKN2C
HSF4	EEF1G	RPL15		18	LYZL6	0	0.03		DCTN1
IL10	EEF2	RPL27		19	RARG	0.003	0.038		NDUFA6
IL1B	EIF3G	RPL3		20	REPS2	0.001	0.044		LSM6
KCNMA1	EIF4A1	RPL35		21	RGS12	0	0.002
L3MBTL1	ELN	RPL4		22	SATB2	0.0321299	0.017
LARP1	EP400	RPLP0		23	SLC6A6	0.035	0.02
LGALS4	EZH1	RPP30		24	TRIM31	0.041	0
LYZL6	FEN1	RPS19		25	TTC39A	0.042	0.006
MFSD5	FKBP1A	RPS5		26	ACHE	0.034	0.01
MGAM	FOLR1	RPS9		27	ATF3	0.031316	0.003
MUC4	GOLGA2	SERBP1		28	ATG9A	0.038175	0.008
PIP4K2A	GNAI3	SHMT1		29	ATP5D	0.01	0.045
RARG	HADH	STK19		30	BTN3A3	0.00830345	0.006
REPS2	HMGN4	SUCLG2		31	CDKN1C	0.039	0.01
RGS12	IDH3B	TAF11		32	CDKN2C	0.03475	0.002
RUNX1	IGF1	TNPO2		33	COL14A1	0.038	0.009
SATB2	IGHM	TOR1A		34	CSNK2B	0	0.047
SLC35A2	ILF3	TUBGCP3		35	DBI	0.0217544	0.012
SLC6A6	INPP1	ZFP36L2		36	ELN	0.035	0.005
SYT5	INPP4A			37	FOLR1	0.03	0.009
THBS1	ITPKB			38	GNAI3	0.0107053	0.003
TNFRSF10C	ITSN1			39	GOLGA2	0.0237288	0.028
TRIM31	LSM6			40	LSM6	0.0149386	0.041
TRPM1	MCM5			41	MYL6B	0.035	0.01
TTC39A	MLX			42	NASP	0.01	0.044
TUBGCP4	MRPL9			43	NDUFA6	0.0183571	0.046
UBE3B	MYL6B			44	PDE6D	0.01	0.04
				45	PDXK	0.0149386	0.002
				46	PRKCI	0.0127093	0.001
				47	RPP30	0	0.045
				48	TNPO2	0.00594277	0.002
				49	TOR1A	0.0301177	0.044
				50	TUBGCP3	0.0402092	0.001

## Sheet: table 2
Supplemental table 2.The genes in the chemoresistant signature.
The expression of genes were compared with Wilcoxon rank sum test between
chemoresistant and sensitive and resistant ones from GSE349&350 and GSE25055.
Their function were annotated by Gene ontolgoy (GO).
Gene	p value		Up or down	NCBI No.	GO Component	GO Function	GO Process	Drug resistance implications
	GSE349	GSE25055	in resist
DBI	0.022	0.012	down	NM_001079862 /// NM_001079863 /// NM_001178017 /// NM_001178041 /// NM_001178042 /// NM_001178043 /// NM_020548	GO:0043231//intracellular membrane-bounded organelle	GO:0005102//receptor binding;GO:0005504//fatty acid binding	GO:0051234//establishment of localization	N/A
ATG9A	0.038	0.008	down	NM_001077198 /// NM_024085	GO:0005774//vacuolar membrane;GO:0031224//intrinsic to membrane;GO:0031982//vesicle	-	GO:0006810//transport;GO:0007033//vacuole organization;GO:0044248//cellular catabolic process	Related with autophagy[1], which may induce apoptosis pathways[2].
TNFRSF10C	0.036	0.034	up	NM_003841	GO:0016021//integral to membrane	GO:0004872//receptor activity;GO:0005488//binding	GO:0023060;GO:0043066//negative regulation of apoptotic process	Also called as DcR1, is a negative regulator of apoptosis
								and promotes resistant against TRAIL-induced apoptosis[3].
FGFR1	0.001	0.004	up	NM_001174063 /// NM_001174064 /// NM_001174065 /// NM_001174066 /// NM_001174067 /// NM_015850 /// NM_023105 /// NM_023106 /// NM_023110	GO:0005626//insoluble fraction;GO:0016021//integral to membrane	GO:0004714//transmembrane receptor protein tyrosine kinase activity;GO:0005539//glycosaminoglycan binding;GO:0019838//growth factor binding;GO:0032559	GO:0003156//regulation of organ formation;GO:0006464//protein modification process;GO:0006915//apoptotic process;GO:0007243//intracellular protein kinase cascade;GO:0007420//brain development;GO:0007431//salivary gland development;GO:0008284//positive regulation of cell proliferation;GO:0008543//fibroblast growth factor receptor signaling pathway;GO:0010467//gene expression;GO:0010975//regulation…	Mediates breast cancer malignancy, and contribute to drug resistance[4, 5].
PRKCI	0.013	0.001	down	NM_002740	GO:0005626//insoluble fraction;GO:0030427//site of polarized growth;GO:0043231//intracellular membrane-bounded organelle;GO:0043296//apical junction complex;GO:0044444//cytoplasmic part	GO:0004674//protein serine/threonine kinase activity;GO:0008289//lipid binding;GO:0032559;GO:0046914//transition metal ion binding	GO:0001754//eye photoreceptor cell differentiation;GO:0006464//protein modification process;GO:0006605//protein targeting;GO:0006900//membrane budding;GO:0010828//positive regulation of glucose transport;GO:0023033;GO:0030036//actin cytoskeleton organization;GO:0032868//response to insulin stimulus;GO:0034097//response to cytokine stimulus;GO:0034330;GO:0035088//establishment or maintenance of ap…	Although found as an oncogene in some cancers[6], it also mediates tight
								junction of cancer cells, may inhibit motility and mesenchymal transition [7, 8].
ATF3	0.031	0.003	down	NM_001030287 /// NM_001040619 /// NM_001674	GO:0031981//nuclear lumen;GO:0043234//protein complex	GO:0001071//nucleic acid binding transcription factor activity;GO:0003677//DNA binding;GO:0003712//transcription cofactor activity	GO:0006006//glucose metabolic process;GO:0006351//transcription, DNA-dependent;GO:0008283//cell proliferation;GO:0010468//regulation of gene expression	Induce apoptosis in cancer cells[9].
TNPO2	0.006	0.002	down	NM_001136195 /// NM_001136196 /// NM_013433	GO:0043231//intracellular membrane-bounded organelle	GO:0005048//signal sequence binding;GO:0022892	GO:0015031//protein transport	N/A
UBE3B	0.022	0.003	up	NM_130466 /// NM_183415	GO:0044464//cell part	GO:0016879//ligase activity, forming carbon-nitrogen bonds	GO:0043412//macromolecule modification	N/A
TOR1A	0.03	0.044	down	NM_000113	GO:0031090//organelle membrane;GO:0031224//intrinsic to membrane;GO:0043231//intracellular membrane-bounded organelle	GO:0005488//binding	-	N/A
SATB2	0.032	0.017	up	NM_001172509 /// NM_001172517 /// NM_015265	GO:0000785//chromatin;GO:0016585//chromatin remodeling complex;GO:0034399//nuclear periphery	GO:0001071//nucleic acid binding transcription factor activity;GO:0003677//DNA binding	GO:0001649//osteoblast differentiation;GO:0006357//regulation of transcription from RNA polymerase II promoter;GO:0009888//tissue development;GO:0016477//cell migration;GO:0016568//chromatin modification;GO:0048562//embryonic organ morphogenesis	Increase tumor cell migration and invasion[10].
GOLGA2	0.024	0.028	down	NM_004486	GO:0000139//Golgi membrane;GO:0005626//insoluble fraction;GO:0032991//macromolecular complex;GO:0044297//cell body	GO:0005515//protein binding	-	A cis-Golgi matrix protein, may modulate cell motility [11].
GNAI3	0.011	0.003	down	NM_006496	GO:0005626//insoluble fraction;GO:0019897//extrinsic to plasma membrane;GO:0030141//secretory granule	GO:0001664//G-protein coupled receptor binding;GO:0017111//nucleoside-triphosphatase activity;GO:0032561//guanyl ribonucleotide binding;GO:0060089	GO:0007188//G-protein signaling, coupled to cAMP nucleotide second messenger;GO:0016192//vesicle-mediated transport;GO:0031280;GO:0050804//regulation of synaptic transmission;GO:0051046//regulation of secretion	Involved in autophagy and apoptosis [12]
DTNA	0.013	0.022	up	NM_001128175 /// NM_001390 /// NM_001391 /// NM_001392 /// NM_032975 /// NM_032978 /// NM_032979 /// NM_032980 /// NM_032981	GO:0016010//dystrophin-associated glycoprotein complex;GO:0042598//vesicular fraction;GO:0044424//intracellular part;GO:0044459//plasma membrane part	GO:0046914//transition metal ion binding	GO:0006936//muscle contraction;GO:0007268//synaptic transmission	Interact with dystrophin, mediate cell-extracellular matrix interaction
								and actin-based cytoskeleton, so increase cell invasion[13].
TUBGCP3	0.04	0.001	down	NM_006322	GO:0000922//spindle pole;GO:0005813//centrosome	GO:0005198//structural molecule activity;GO:0015631//tubulin binding	GO:0000226//microtubule cytoskeleton organization;GO:0009566//fertilization	Participates of Gamma-tubulin forming, disorder of which may lead to
								centrosome aberrations, so that promote cancer invasion and metastasis[14].
PDXK	0.015	0.002	down	NM_003681	GO:0000267//cell fraction;GO:0044444//cytoplasmic part	GO:0016301//kinase activity;GO:0031420;GO:0032559;GO:0042802//identical protein binding;GO:0046914//transition metal ion binding;GO:0048037//cofactor binding;GO:0070279	GO:0006796//phosphate-containing compound metabolic process;GO:0008614//pyridoxine metabolic process;GO:0009108//coenzyme biosynthetic process;GO:0009636//response to toxin;GO:0010212//response to ionizing radiation;GO:0010243//response to organic nitrogen;GO:0031667//response to nutrient levels;GO:0045767//regulation of anti-apoptosis;GO:0048545//response to steroid hormone stimulus	Required for the metabolism of vitamin B6 which
								may prevent breast cancer progression [15].
BTN3A3	0.008	0.006	down	NM_006994 /// NM_197974	GO:0031224//intrinsic to membrane	-	GO:0044238//primary metabolic process	N/A
CDKN2C	0.035	0.002	down	NM_001262 /// NM_078626	GO:0043231//intracellular membrane-bounded organelle	GO:0016538//cyclin-dependent protein kinase regulator activity;GO:0016772//transferase activity, transferring phosphorus-containing groups;GO:0019900//kinase binding	GO:0008283//cell proliferation;GO:0010001//glial cell differentiation;GO:0012502//induction of programmed cell death;GO:0016049//cell growth;GO:0016310//phosphorylation;GO:0022402//cell cycle process;GO:0051726//regulation of cell cycle	Also called as p18, it suppresses cell growth[16].
DCTN1	0.02	0.038	up	NM_001135040 /// NM_001135041 /// NM_001190836 /// NM_001190837 /// NM_004082 /// NM_023019 /// NR_033935	GO:0000775//chromosome, centromeric region;GO:0005875//microtubule associated complex;GO:0044444//cytoplasmic part	GO:0005488//binding;GO:0017111//nucleoside-triphosphatase activity	GO:0000087//M phase of mitotic cell cycle;GO:0048731	Induces asymmetric cell divisions to promote Notch-dependent pathways [17],
								which stimulates epithelial mesenchymal transition and drug resistance[18].
NDUFA6	0.018	0.046	down	NM_002490	GO:0005746//mitochondrial respiratory chain	GO:0050136//NADH dehydrogenase (quinone) activity	GO:0006950//response to stress;GO:0022904//respiratory electron transport chain;GO:0051234//establishment of localization	N/A
LSM6	0.015	0.041	down	NM_007080	GO:0030529//ribonucleoprotein complex;GO:0043231//intracellular membrane-bounded organelle	GO:0003676//nucleic acid binding;GO:0046983//protein dimerization activity	GO:0006396//RNA processing;GO:0006399//tRNA metabolic process;GO:0006401//RNA catabolic process;GO:0042254//ribosome biogenesis	N/A
Reference List
[1] C. He and D.J. Klionsky. Autophagy. 3 (2007) 271-274.
[2] M.C. Maiuri et al. Nat. Rev. Mol. Cell Biol. 8 (2007) 741-752.
[3] D. Bernard et al. J. Biol. Chem. 276 (2001) 27322-27328.
[4] R. Sharpe et al. Clin. Cancer Res. 17 (2011) 5275-5286.
[5] N. Turne et al. Cancer Res. 70 (2010) 2085-2094.
[6] N.R. Murray, K.R. Kalari, and A.P. Fields. J. Cell Physiol 226 (2011) 879-887.
[7] D. Coradini et al. Int. J. Surg. Oncol. 2012 (2012) 984346.
[8] G. Moreno-Bueno, F. Portillo, and A. Cano. Oncogene 27 (2008) 6958-6969.
[9] X. Huang, X. Li, and B. Guo. J. Biol. Chem. 283 (2008) 29795-29801.
[10] O. Aprelikova et al. Cell Cycle 9 (2010) 4387-4398.
[11] H. Mellor. Curr. Biol. 14 (2004) R434-R435.
[12] T. Wu et al. PLoS. One. 9 (2014) e94634.
[13] D.S. Bredt. Nat. Cell Biol. 1 (1999) E89-E91.
[14] E.A. Nigg. Nat. Rev. Cancer 2 (2002) 815-825.
[15] S.M. Zhang et al. Cancer Inst. 95 (2003) 373-380.
[16] K.L. Guan et al. Genes Dev. 8 (1994) 2939-2952.
[17] S.E. Williams et al. Nature 470 (2011) 353-358.
[18] J.M. Lee et al. J. Cell Biol. 172 (2006) 973-981.

## Sheet: table 3
Supplemental table 3. the TAXSig scoresand chemoresponse prediction in chemoresistant
and chemoshensitive patients from GSE349&350 and GSE25055 data sets. The TAXSig equation was from GSE25055.
The individules were also classified by binary logistic regression. Probability at 0.5 was set as cutoff point.
GSE349&350						GSE25055						GSE25055, chemoresponse indeterminate
Sample GEO accession	chemoresponse,sensitive:0 resistant:1	Predeicted response, chemosensitive:0 chemoresistant:1	signature score	logistic regression predeicted response, chemosensitive:0 chemoresistant:1	probability of resistance	Sample GEO accession	chemoresponse,sensitive:0 resistant:1	TAXSig predeicted response, chemosensitive:0 chemoresistant:1	signature score	logistic regression predeicted response, chemosensitive:0 chemoresistant:1	probability of resistance	Sample GEO accession	Predeicted response, chemosensitive:0 chemoresistant:1	signature score
GSM4903	0	0	-5.9	0	0	GSM615096	1	1	-2.35	1	0.99	GSM615097	0	0.18
GSM4907	0	0	-8.59	0	0.19	GSM615104	1	1	-0.64	1	0.58	GSM615098	0	0.81
GSM4908	0	0	-7.94	0	0.07	GSM615108	1	1	-0.48	1	0.76	GSM615100	1	-0.73
GSM4914	0	0	-8.81	0	0.49	GSM615109	1	0	1.13	0	0.29	GSM615101	0	0.14
GSM4915	0	0	-6.29	0	0.01	GSM615111	1	0	2.11	0	0.05	GSM615102	1	-0.44
GSM4917	0	0	-6.37	0	0.03	GSM615113	1	1	-1.83	1	0.97	GSM615103	1	-1.66
GSM4919	0	0	-4.02	0	0	GSM615114	1	1	-1.22	1	0.93	GSM615105	1	-1.3
GSM4920	0	0	-8.39	0	0.41	GSM615126	1	1	-0.62	1	0.77	GSM615106	1	-2.29
GSM4921	0	0	-6.06	0	0.01	GSM615131	1	1	-1.53	1	0.96	GSM615107	0	0.59
GSM4923	0	0	-7.34	0	0.05	GSM615132	1	1	-0.38	1	0.75	GSM615112	0	2.13
GSM4913	0	0	-6.14	0	0.1	GSM615133	1	1	-2.26	1	0.99	GSM615115	1	0.04
GSM4901	1	1	-13.21	1	1	GSM615134	1	1	-0.57	1	0.83	GSM615116	1	-0.39
GSM4902	1	1	-10.62	1	1	GSM615135	1	1	-1.02	1	0.89	GSM615117	1	-0.27
GSM4904	1	1	-9.86	1	1	GSM615136	1	1	-1.24	1	0.93	GSM615118	0	0.96
GSM4905	1	1	-17.88	1	1	GSM615141	1	1	-1.51	1	0.96	GSM615119	1	-0.77
GSM4906	1	1	-9.23	1	0.99	GSM615149	1	1	-0.05	1	0.73	GSM615120	1	-1.05
GSM4909	1	1	-16.17	1	1	GSM615150	1	1	-2.13	1	0.98	GSM615121	1	-1.29
GSM4910	1	1	-10.92	1	0.82	GSM615158	1	1	-2.12	1	0.99	GSM615124	1	-0.54
GSM4911	1	1	-9.9	1	0.78	GSM615160	1	1	-0.39	1	0.77	GSM615125	0	0.27
GSM4912	1	0	-7.01	1	0.96	GSM615161	1	1	-0.1	1	0.51	GSM615127	1	-0.43
GSM4916	1	1	-9.58	1	0.97	GSM615178	1	1	-0.04	1	0.62	GSM615128	1	-0.3
GSM4918	1	1	-9.39	1	1	GSM615195	1	1	-0.04	1	0.65	GSM615129	1	-0.39
GSM4922	1	1	-10.36	1	0.99	GSM615197	1	1	-0.13	1	0.59	GSM615130	0	0.11
GSM4924	1	1	-12.05	1	1	GSM615205	1	1	-1.42	1	0.93	GSM615138	1	-0.56
		threshold=-9.16				GSM615208	1	1	-0.72	1	0.84	GSM615142	1	-1.45
						GSM615214	1	1	-1.14	1	0.92	GSM615144	1	-2.1
						GSM615218	1	1	-1.63	1	0.97	GSM615145	0	2.11
						GSM615223	1	1	-0.07	1	0.64	GSM615147	1	-0.61
						GSM615224	1	1	-1.76	1	0.99	GSM615148	1	-0.24
						GSM615225	1	0	1.8	0	0.13	GSM615151	0	0.54
						GSM615228	1	0	1.16	0	0.26	GSM615152	0	0.15
						GSM615231	1	1	-1.23	1	0.93	GSM615153	0	-0.34
						GSM615233	1	1	-0.87	1	0.79	GSM615155	1	-0.78
						GSM615241	1	1	-1.04	1	0.92	GSM615156	0	3.76
						GSM615245	1	1	-0.98	1	0.87	GSM615157	1	-1.06
						GSM615247	1	1	-1.17	1	0.91	GSM615159	1	-0.7
						GSM615253	1	1	-0.66	1	0.81	GSM615162	1	-0.5
						GSM615255	1	1	-0.24	1	0.52	GSM615163	1	-3.05
						GSM615259	1	0	0.75	0	0.31	GSM615165	1	-0.89
						GSM615268	1	1	-1.58	1	0.97	GSM615166	1	-1.82
						GSM615271	1	1	-0.44	1	0.82	GSM615168	1	-1.6
						GSM615273	1	1	-1.14	1	0.93	GSM615169	1	-0.29
						GSM615279	1	1	-1.11	1	0.91	GSM615170	0	0.46
						GSM615287	1	1	-0.01	1	0.59	GSM615172	1	-1.54
						GSM615298	1	1	-1.63	1	0.98	GSM615173	1	-1.92
						GSM615301	1	1	-0.12	1	0.7	GSM615174	1	-1.4
						GSM615303	1	0	0.97	0	0.34	GSM615176	1	-1.08
						GSM615305	1	1	-0.86	1	0.88	GSM615177	1	-0.3
						GSM615306	1	1	-0.48	1	0.78	GSM615179	1	-2.23
						GSM615309	1	1	-1.57	1	0.95	GSM615180	1	-0.25
						GSM615312	1	1	-0.55	1	0.87	GSM615182	0	0.6
						GSM615314	1	1	-1.19	1	0.88	GSM615183	1	-0.21
						GSM615318	1	1	-0.42	1	0.8	GSM615184	0	2.41
						GSM615320	1	1	-1.86	1	0.98	GSM615185	0	2.11
						GSM615322	1	1	-0.59	1	0.57	GSM615187	1	-2
						GSM615328	1	1	-1.94	1	0.98	GSM615188	1	-0.23
						GSM615329	1	1	-1.18	1	0.92	GSM615189	1	-0.16
						GSM615330	1	1	-1.9	1	0.98	GSM615190	0	2.11
						GSM615335	1	1	-1.9	1	0.98	GSM615192	1	-0.66
						GSM615345	1	1	-0.74	1	0.85	GSM615196	1	-0.76
						GSM615351	1	1	-1.96	1	0.98	GSM615198	1	-0.82
						GSM615358	1	1	-1.69	1	0.96	GSM615199	1	-0.96
						GSM615367	1	1	-1.05	1	0.9	GSM615200	1	-0.61
						GSM615368	1	0	0.81	0	0.31	GSM615203	1	-0.66
						GSM615369	1	1	-0.14	1	0.59	GSM615204	1	-0.15
						GSM615373	1	1	-1.6	1	0.98	GSM615206	1	-1.83
						GSM615376	1	1	-1.82	1	0.98	GSM615207	1	-1.7
						GSM615380	1	1	-0.21	1	0.51	GSM615210	1	-0.36
						GSM615381	1	1	-1.57	1	0.95	GSM615216	1	-0.24
						GSM615386	1	1	-1.25	1	0.91	GSM615217	1	-1.46
						GSM615387	1	1	-0.55	1	0.85	GSM615219	0	0.55
						GSM615389	1	1	-2.11	1	0.98	GSM615220	1	-1.17
						GSM615390	1	1	-0.95	1	0.89	GSM615221	1	-0.41
						GSM615392	1	1	-0.48	1	0.83	GSM615222	1	-0.21
						GSM615398	1	1	-1.37	1	0.95	GSM615226	0	0.83
						GSM615399	1	1	-0.38	1	0.78	GSM615227	0	0.3
						GSM615402	1	0	0.24	0	0.44	GSM615229	0	0.92
						GSM615404	1	1	-0.31	1	0.74	GSM615230	0	1.45
						GSM615405	1	1	-1.72	0	0.1	GSM615232	1	-0.16
						GSM615099	0	0	2.29	0	0.03	GSM615234	0	0.37
						GSM615110	0	1	-0.06	1	0.67	GSM615235	1	-0.47
						GSM615122	0	1	-0.23	1	0.73	GSM615236	1	-0.89
						GSM615123	0	0	0.84	0	0.38	GSM615237	1	-2.24
						GSM615137	0	0	0.98	0	0.34	GSM615238	1	-0.57
						GSM615139	0	0	0.43	0	0.49	GSM615239	1	-2.18
						GSM615140	0	0	0.87	0	0.38	GSM615243	1	-0.64
						GSM615143	0	0	2.66	0	0.01	GSM615244	0	1.83
						GSM615146	0	0	0.94	0	0.29	GSM615246	1	-2.1
						GSM615154	0	0	0.78	0	0.33	GSM615248	0	1.29
						GSM615164	0	0	0.15	1	0.6	GSM615249	1	-0.38
						GSM615167	0	0	1.74	0	0.06	GSM615250	0	1.72
						GSM615171	0	0	0.46	0	0.38	GSM615251	0	0.22
						GSM615175	0	1	-0.62	1	0.83	GSM615252	1	-0.88
						GSM615181	0	0	1.16	0	0.17	GSM615254	1	-0.45
						GSM615186	0	1	-0.38	1	0.72	GSM615257	0	0.22
						GSM615191	0	0	2.47	0	0.02	GSM615258	0	0.23
						GSM615193	0	0	1.2	0	0.2	GSM615260	0	2.32
						GSM615194	0	0	3.44	0	0	GSM615261	1	-0.86
						GSM615201	0	0	0.85	0	0.25	GSM615262	0	0.03
						GSM615202	0	0	0.17	0	0.43	GSM615265	0	0.14
						GSM615209	0	0	0.69	0	0.36	GSM615266	0	1.37
						GSM615211	0	0	2.27	0	0.04	GSM615267	1	-0.76
						GSM615212	0	0	0.84	0	0.4	GSM615269	1	-0.41
						GSM615213	0	0	0.79	0	0.31	GSM615272	1	-0.05
						GSM615215	0	0	1.5	0	0.1	GSM615274	1	-0.12
						GSM615240	0	0	1.9	0	0.07	GSM615275	1	-0.19
						GSM615242	0	0	1.26	0	0.24	GSM615276	0	0.23
						GSM615256	0	0	0.2	0	0.41	GSM615277	1	-0.59
						GSM615263	0	0	0.56	0	0.32	GSM615278	1	-1.58
						GSM615264	0	0	0.43	0	0.46	GSM615281	1	0.19
						GSM615270	0	0	0.21	0	0.22	GSM615282	0	0.8
						GSM615280	0	0	0.94	0	0.22	GSM615283	0	-0.33
						GSM615284	0	0	3.43	0	0	GSM615285	1	-2.2
						GSM615291	0	0	2.32	0	0.02	GSM615286	1	-0.01
						GSM615293	0	0	2.11	0	0.07	GSM615288	0	1.21
						GSM615300	0	1	-0.45	1	0.83	GSM615289	0	1.01
						GSM615307	0	0	0.58	0	0.39	GSM615290	0	1.69
						GSM615310	0	0	2.03	0	0.06	GSM615292	0	1.23
						GSM615324	0	0	1.42	0	0.12	GSM615294	0	2.82
						GSM615325	0	0	2.1	0	0.05	GSM615295	1	-0.45
						GSM615331	0	0	0.4	0	0.38	GSM615296	0	1.1
						GSM615334	0	0	1.59	0	0.11	GSM615297	1	-0.4
						GSM615336	0	0	1.37	0	0.12	GSM615299	1	-1.81
						GSM615338	0	0	0.66	0	0.31	GSM615302	0	-2.29
						GSM615353	0	1	-0.54	0	0.8	GSM615304	1	-1.69
						GSM615354	0	0	1.08	0	0.21	GSM615308	1	-1.64
						GSM615357	0	0	1.14	0	0.2	GSM615311	0	0.56
						GSM615359	0	0	1.71	0	0.11	GSM615313	0	0.88
						GSM615371	0	0	0.56	0	0.4	GSM615315	1	-0.22
						GSM615375	0	0	1.05	0	0.26	GSM615316	1	-1.1
						GSM615379	0	0	0.05	1	0.61	GSM615317	0	1.27
						GSM615383	0	1	-1.94	1	0.99	GSM615319	1	-0.77
						GSM615393	0	1	-1.01	0	0.22	GSM615321	0	0.56
						GSM615394	0	0	1.45	0	0.16	GSM615323	0	0.37
						GSM615396	0	0	1.65	0	0.14	GSM615326	0	1
						GSM615397	0	0	0.58	0	0.33	GSM615327	1	-3.38
									threshold=0			GSM615332	1	-1.52
												GSM615333	1	-0.74
												GSM615337	1	-1.71
												GSM615339	1	-1.79
												GSM615340	1	-0.82
												GSM615341	1	-1.16
												GSM615342	1	-0.7
												GSM615343	1	-1.65
												GSM615344	1	-0.36
												GSM615346	1	-0.87
												GSM615347	1	-1
												GSM615348	0	1.75
												GSM615349	1	-0.29
												GSM615350	1	-0.7
												GSM615352	1	-0.1
												GSM615355	1	-1.01
												GSM615356	1	-0.96
												GSM615360	1	-2.74
												GSM615361	1	-1.71
												GSM615362	1	-1.51
												GSM615363	1	-0.43
												GSM615364	0	1.59
												GSM615365	1	-1.77
												GSM615366	1	-2.31
												GSM615370	1	-0.54
												GSM615372	0	0.63
												GSM615374	1	-1.04
												GSM615377	1	-1.42
												GSM615378	0	0.96
												GSM615382	1	-1.34
												GSM615384	1	-1.24
												GSM615385	0	0.28
												GSM615388	0	0.79
												GSM615391	1	-1.32
												GSM615395	1	-1.42
												GSM615400	0	0.08
												GSM615401	0	0.68
												GSM615403	0	2.16
